# Supplementary material
Source: publisher site journal article supplement (https://www.dovepress.com/article/228797)
Supplement: Supplementary file 1 [file get_supplementary_file.php]

## **Methods**

### **Flow cytometry (FCM)**

The rBMSCs were seeded at  $1 \times 10^5$  cells/well in a 6-well plate and incubated overnight. The delivery systems, which loaded with fluorescence-labeled miR-26a, were added to each well at final concentrations of 5, 10, 20, 25, 50, and 100  $\mu\text{g}/\text{mL}$ . At various time points post incubation, the cells were collected and washed thrice with PBS. The efficiency of transfection was characterized by FCM (BD FACSCalibur, San Jose, USA) and the obtained results were analyzed using the FlowJo software (Tree star, Ashland, OR).

## Results

Supplementary Figure 1. Transfection efficiency detected by FCM.

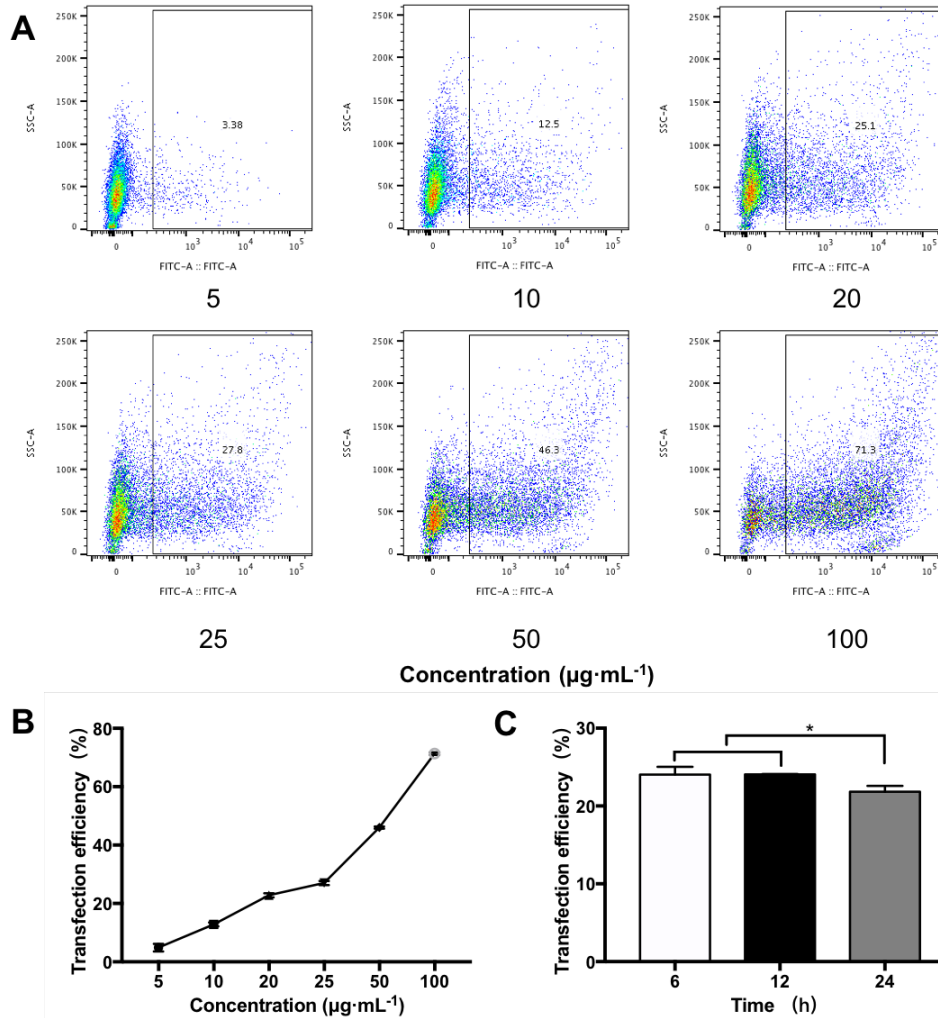

**Notes:** (A) Fluorescence intensity of rBMSCs transfected with different doses of MSN\_miR-26a@PEI-KALA and MSN\_miR-NC@PEI-KALA at 12 h. (B) Transfection efficiency of rBMSCs treated with different doses of MSN\_miR-26a@PEI-KALA at 12 h. (C) Transfection efficiency of rBMSCs treated with 20  $\mu\text{g}/\text{mL}$  MSN\_miR-26a@PEI-KALA at 6 h, 12 h, and 24 h. (\* $P < 0.05$ , compared with the control).

**Abbreviations:** FCM, flow cytometry; MSN, mesoporous silicon nanoparticle; rBMSCs, rat bone marrow mesenchymal stem cells.
